# Supplementary material for: CLEC12A Binds to Legionella pneumophila but Has No Impact on the Host’s Antibacterial Response
Source: MDPI journal article supplement (doi:10.3390/ijms24043891), 2023-02-15
Supplement: s1 [file s1]

## CLEC12A binds to *Legionella pneumophila* but does not significantly influence antibacterial host response

### Supplements

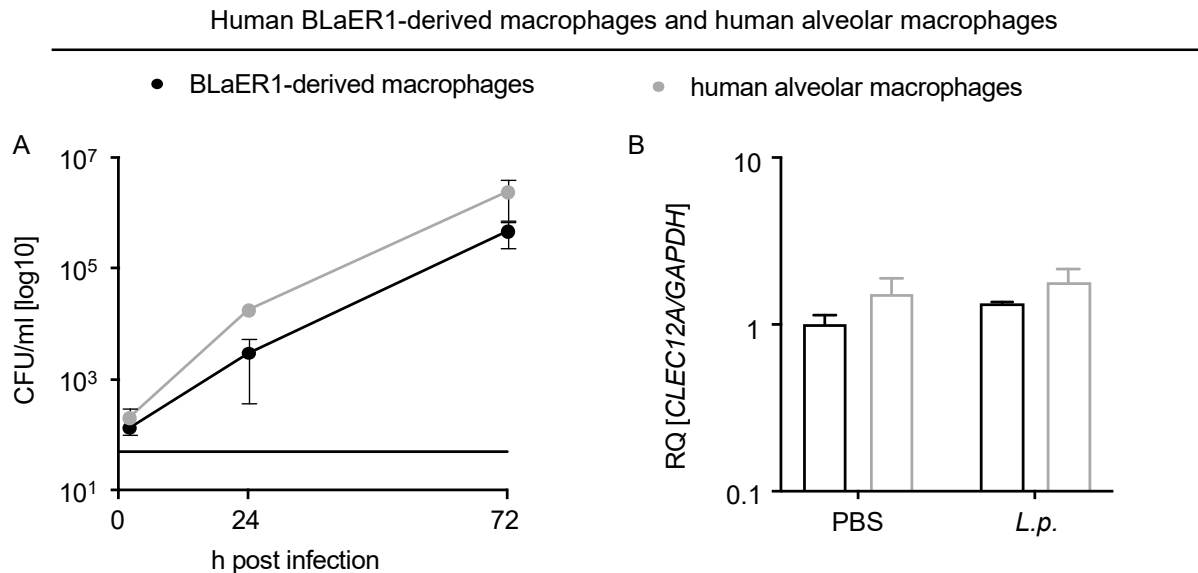

**Figure S1: Human BLaER1-derived macrophages support replication of *L. pneumophila* and show similar expression levels of *CLEC12A* as human alveolar macrophages.** (A) Human alveolar macrophages and BLaER1-derived human macrophage-like cells were infected with *L. pneumophila* JR32 WT (“*L.p.*”) at a MOI of 0.1 and bacterial replication was evaluated over the course of 72 h. (B) Expression of *CLEC12A* in human alveolar macrophages and BLaER1 macrophages after infection with *L. pneumophila* at a MOI of 10 for 8 h or control treatment was assessed by qRT-PCR. Two independent experiments were carried out in triplicates. All data represent the mean  $\pm$  SD of one representative experiment.
